# Supplementary material for: Structural Basis of RICs Iron Donation for Iron-Sulfur Cluster Biogenesis
Source: PubMed Central journal article supplement (PMC8117158; doi:10.3389/fmicb.2021.670681), 2021-04-29
Supplement: Data_Sheet_1.pdf [file Data_Sheet_1.pdf]

## Supplementary Material

### 1. Supplementary Figures

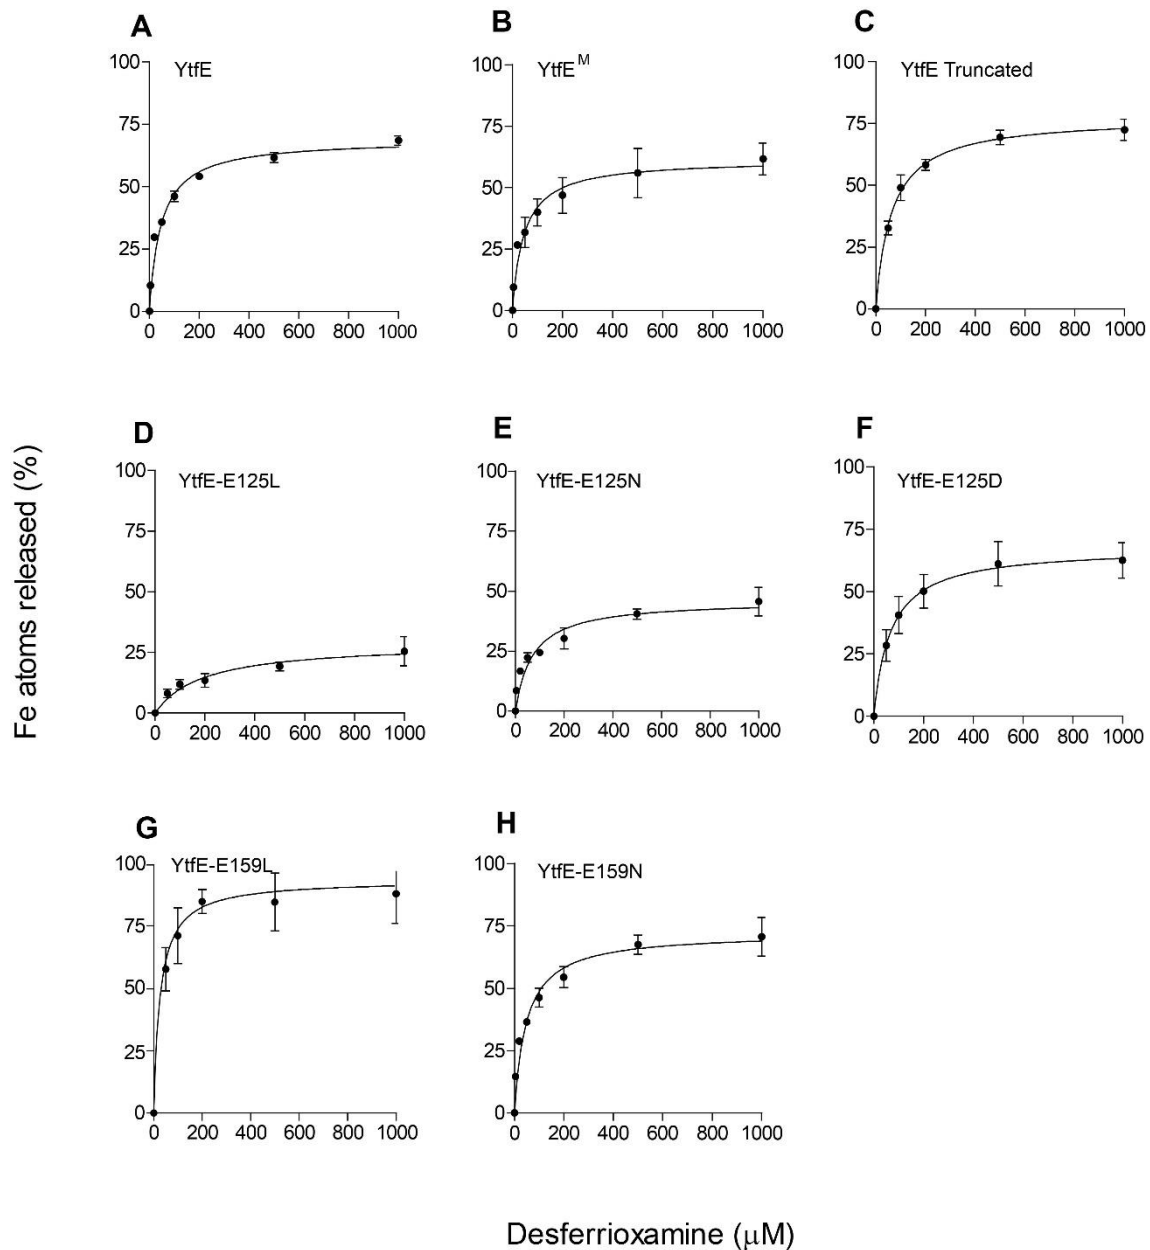

#### Supplementary Figure 1: Ferric iron release from YtfE in the presence of desferrioxamine.

As-isolated proteins (~25 μM) were incubated with 0-1000 μM desferrioxamine under aerobic conditions. The UV-visible spectra were acquired after 24 h and the absorbance at 420 nm of the complex Fe (III)-desferrioxamine, was used to determine the percentage of iron released, as indicated in the Methods section. Assays were performed with at least two independent protein samples.

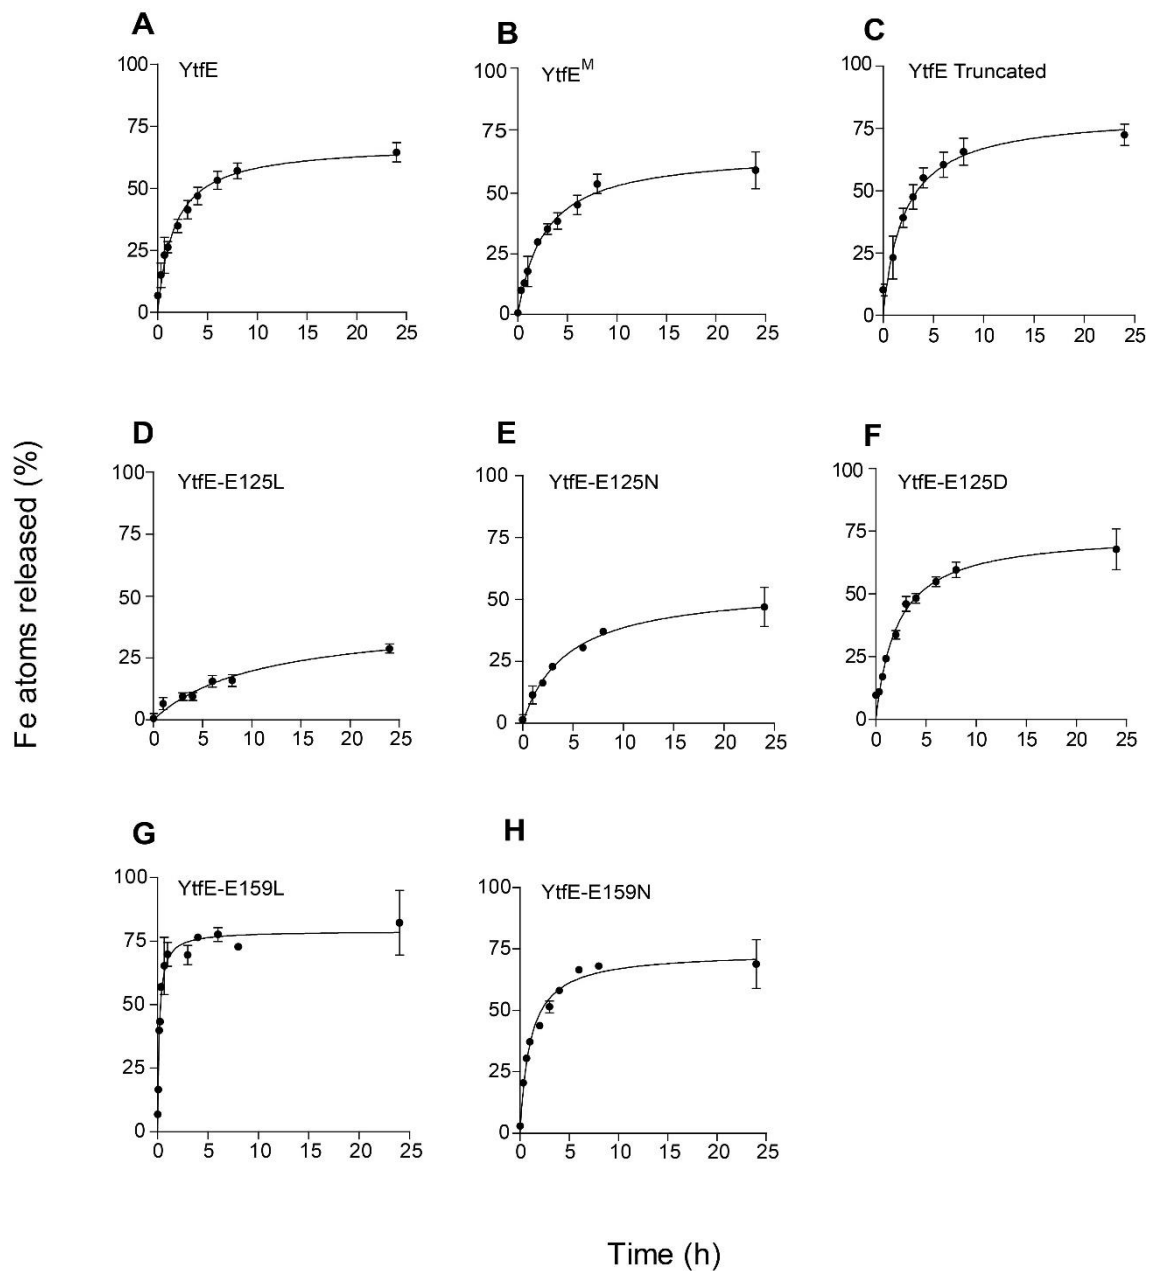

**Supplementary Figure 2: Monitoring the rate of ferric iron release from YtfE mutants over time.** As-isolated proteins (~25  $\mu$ M) were incubated under aerobic conditions with 1000  $\mu$ M desferrioxamine. The release of iron was monitored by acquiring spectra over time (0-24 h). The percentage of iron released was determined using the absorbance at 420 nm of the complex Fe (III)-desferrioxamine. The rate of iron release was determined by the slope of a linear fit to the data points taken within the first hours of the reaction. The assays were performed with at least two independent protein samples.

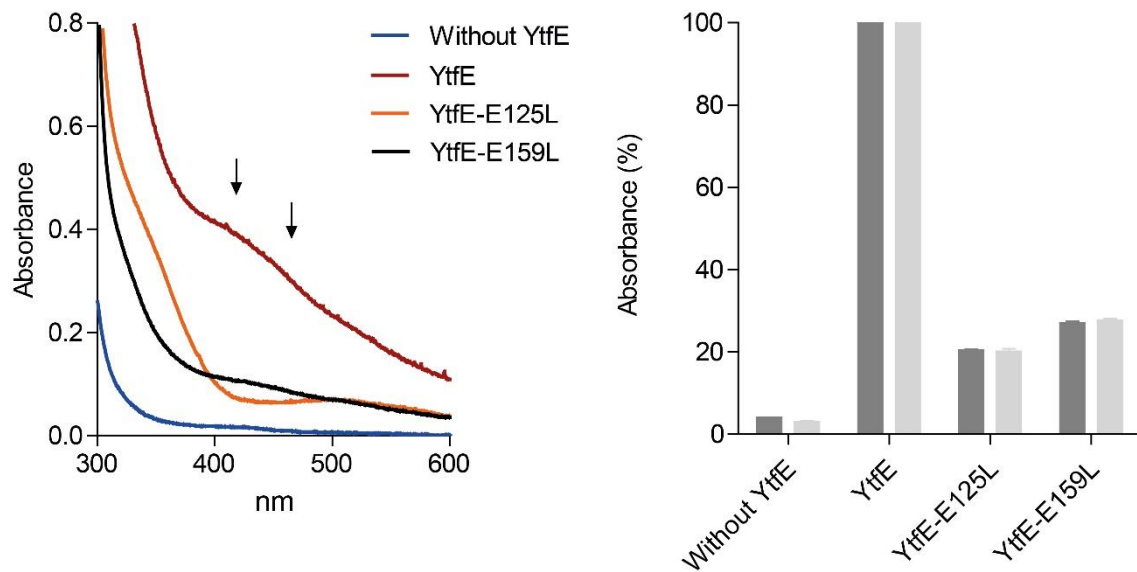

**Supplementary Figure 3: Reconstitution of Fe-S centre in apo-IscU using YtfE.**

Reaction mixtures containing YtfE (wild-type or mutant proteins), IscS and DTT were incubated for 1h. The formation of a mixture of  $[2\text{Fe-2S}]^{2+/1+}$  and  $[4\text{Fe-4S}]^{2+/1+}$  clusters in IscU is shown by the appearance of two bands at  $\sim 456$  nm and  $\sim 410$  nm that are only observed in the UV-visible spectrum of the reaction done with wild-type YtfE (represented in red on the left panel). For each reaction mixture, the right panel shows the absorbance at 456 nm (light gray) and 410 nm (dark gray) relative to the absorbance of the same bands measured for the reaction done with wild-type YtfE.

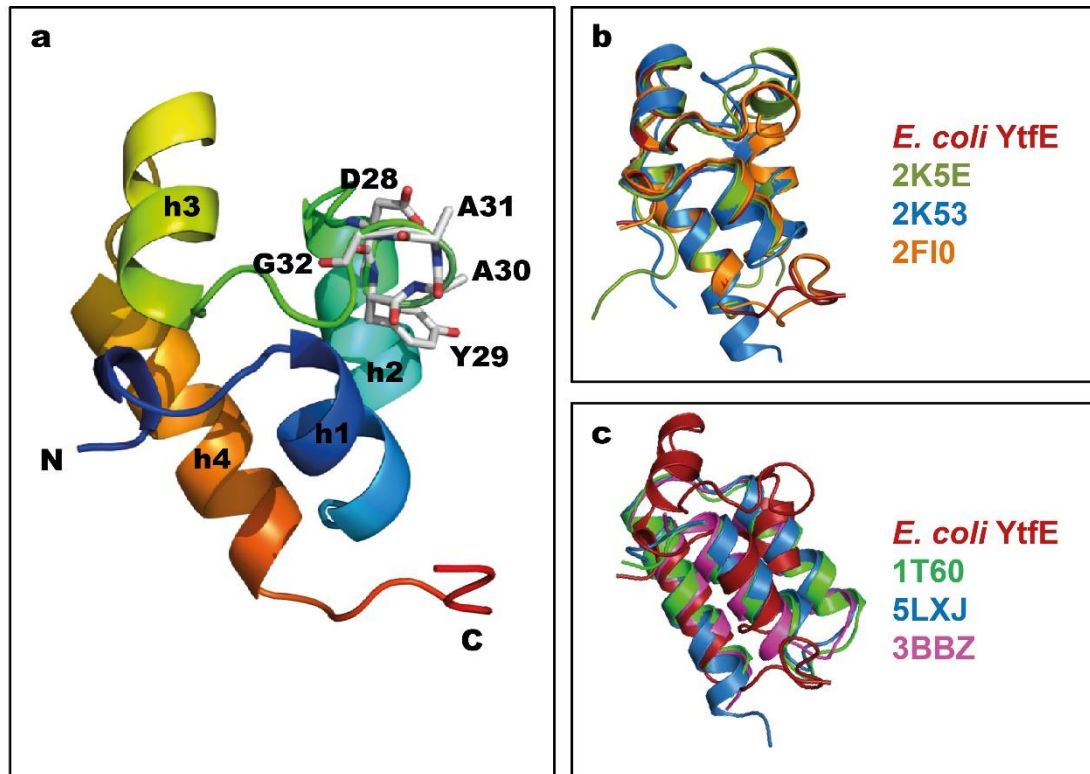

**Supplementary Figure 4: Overall structure of domain A in *E. coli* YtfE<sup>M</sup>.** **a**, Cartoon representation of domain A, rainbow coloured from dark blue at the N-terminal (N) to red at the C-terminal (C). The residues from the DYAAAG motif are represented as sticks. The residues A30 and A31 correspond to the two cysteines C30 and C31 in the wild-type protein. **b**, Cartoon representation of the structural superposition of *E. coli* YtfE<sup>M</sup>-E125L with uncharacterized bacterial protein structures with PDB codes 2K5E (*Methanocaldococcus jannaschii*), 2K53 (*Clostridium thermocellum*) and 2F10 (*Streptococcus pneumoniae* TIGR4), that present high structural homology but low sequence similarity. **c**, Cartoon representation of the structural superposition of *E. coli* YtfE<sup>M</sup>-E125L with the structures with PDB codes 1T6O (nucleocapsid-binding domain of the measles virus P protein), 5LXJ X (domain of *Peste des Petits Ruminants* phosphoprotein) and 3BBZ (nucleocapsid-binding domain from the mumps virus phosphoprotein). These three proteins lack the region between helices 2 and 4.

**a** YtfE<sup>M</sup>
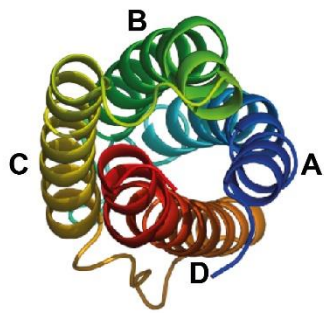
**b** Hemerythrin
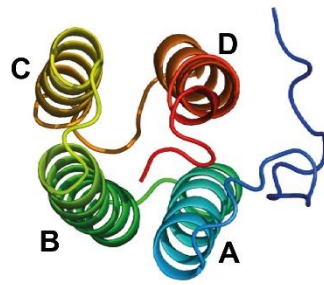
**c** Ruberythrin
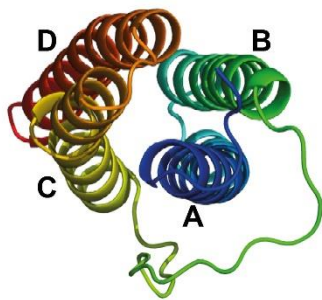
**d** Bacterioferritin
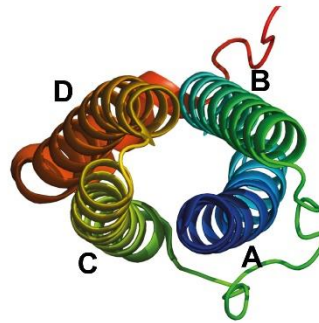

**Supplementary Figure 5: Arrangement of the four-helix bundles in YtfE, rubrerythrin, hemerythrin and ferritin-like proteins.** The helices are coloured from N-terminal in blue to C-terminal in red. **a.** YtfE<sup>M</sup> (PDB code 7BHA) is a left-handed four-helix bundle; **b.** Hemerythrin (PDB code 2MRH) is a right-handed four-helix bundle; **c.** Rubrerythrin (PDB code 1RYT), and **d.** Bacterioferritin (PDB code 1NFV) both starting as left-handed and become right-handed four-helix bundles.

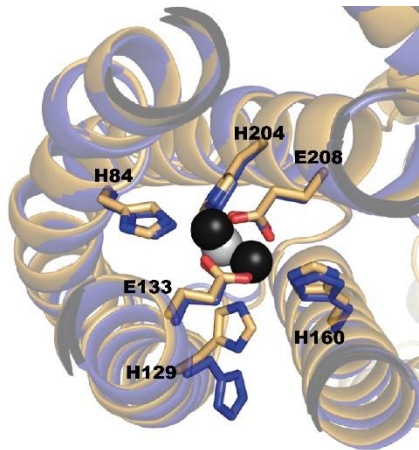

**Supplementary Figure 6: Superposition of the di-iron centre between YtfE<sup>M</sup> and YtfE<sup>M</sup>-E159L.** Detail of YtfE<sup>M</sup>-E159L (represented in blue) showing that H129 assumes a different side chain conformation from that in YtfE<sup>M</sup> (shown in orange). The mononuclear Fe centre of YtfE<sup>M</sup>-E159L is shown as a grey sphere, the di-iron centre of YtfE<sup>M</sup> is represented as black spheres and the coordinating residues H84, H160, H204, E208 and E133 are indicated as sticks.

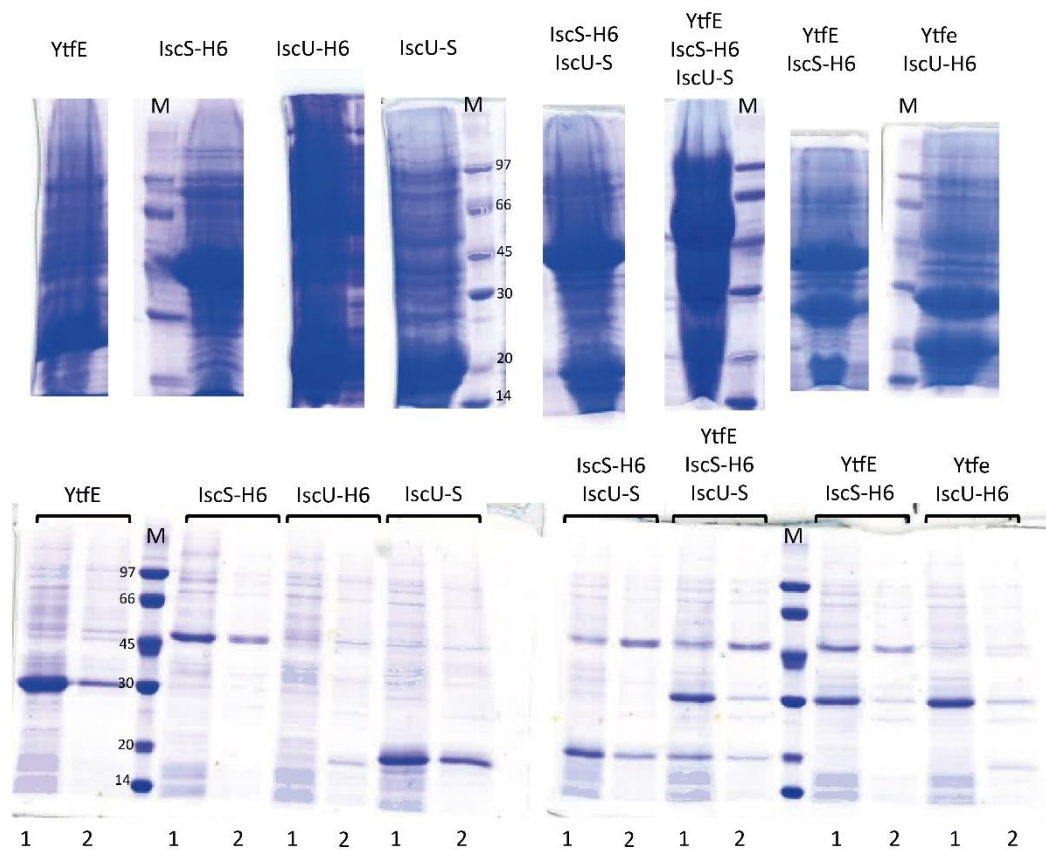

**Supplementary Figure 7: SDS-PAGE of samples used in the pulldown assays.**

Upper panel shows cell extracts immediately before loaded into the column. Lower panel exhibits samples collected at different stages: lanes 1, after washing the column with 15 mL of binding buffer, and lanes 2 after column washing with 25 mL of buffer containing 60 mM of imidazole.

## 2. Supplementary Tables

**Supplementary Table 1: Data collection and processing statistics**

| Data Set                                                                | <i>E. coli</i> YtfE <sup>M</sup>    | <i>E. coli</i> YtfE <sup>M</sup> -E159L      | <i>E. coli</i> YtfE <sup>M</sup> -E125L |
|-------------------------------------------------------------------------|-------------------------------------|----------------------------------------------|-----------------------------------------|
| Beamline                                                                | ALBA XALOC                          | ESRF ID30A-3                                 | Diamond I04                             |
| Detector                                                                | Pilatus 6M                          | Eiger X 4M                                   | Eiger2 XE 16M                           |
| Wavelength (Å)                                                          | 1.7314                              | 0.96770                                      | 0.97950                                 |
| Space group                                                             | <i>P</i> 2 <sub>1</sub>             | <i>P</i> 2 <sub>1</sub>                      | <i>P</i> 2 <sub>1</sub>                 |
| Unit-cell parameters (Å, °)                                             | a=60.06, b=50.65, c=87.85, β=100.54 | a=86.81, b=51.42, c=54.96 β=90.103           | a=59.79, b=49.60, c=87.81, β=100.14     |
| Data Processing                                                         | XDS/POINTLESS/AIMLESS               | AutoPROC/XDS<br>/POINTLESS/STARANISO/AIMLESS | XDS/POINTLESS/AIMLESS                   |
| Resolution limits of ellipsoid fitted to resolution cut-off surface (Å) | -                                   | 2.89, 2.22, 3.23                             | -                                       |
| Resolution range (Å)                                                    | 59.05 - 2.19 (2.23 - 2.19)          | 86.81 - 2.36 (2.64 - 2.36)                   | 86.44 - 1.87 (1.98 - 1.87)              |
| N° of observations                                                      | 149792 (2690)                       | 43151 (2152)                                 | 155605 (7101)                           |
| Unique reflections                                                      | 23568 (549)                         | 11106 (556)                                  | 41865 (2086)                            |
| <I/σ(I)>                                                                | 9.8 (1.6)                           | 10.2 (1.4)                                   | 9.7 (0.9)                               |
| <i>R</i> <sub>merge</sub> <sup>a</sup>                                  | 0.147 (1.548)                       | 0.088 (0.828)                                | 0.082 (1.232)                           |
| <i>R</i> <sub>meas</sub> <sup>b</sup>                                   | 0.160 (1.731)                       | 0.102 (0.959)                                | 0.096 (1.457)                           |
| <i>R</i> <sub>pim</sub> <sup>c</sup>                                    | 0.062 (0.759)                       | 0.052 (0.479)                                | 0.049 (0.767)                           |
| CC <sup>1/2</sup>                                                       | 0.985 (0.354)                       | 0.998 (0.568)                                | 0.999 (0.360)                           |
| Completeness, spherical (%)                                             | 87 (40.2)                           | 55.1 (9.6)                                   | 99.8 (99.4)                             |
| Completeness, ellipsoidal (%)                                           | -                                   | 86.8 (52.7)                                  | -                                       |
| Multiplicity                                                            | 6.4 (4.9)                           | 3.9 (3.9)                                    | 3.7 (3.4)                               |
| Wilson B-factor (Å <sup>2</sup> )                                       | 37.8                                | 47.6                                         | 30.8                                    |
| No. of molecules in a.u.                                                | 2                                   | 2                                            | 2                                       |
| <i>V</i> <sub>m</sub> (Å <sup>3</sup> Da <sup>-1</sup> )                | 2.65                                | 2.47                                         | 3.03                                    |
| Estimated solvent content (%)                                           | 53.7                                | 50.2                                         | 59.4                                    |

Values in parentheses are for the highest resolution shell. <sup>a</sup> Merging *R*-factor,  $R_{\text{merge}} = (\sum_{\text{hkl}} \sum_i |I_i(\text{hkl}) - \langle I(\text{hkl}) \rangle|) / (\sum_{\text{hkl}} \sum_i I(\text{hkl})) \times 100\%$ , where  $I_i(\text{hkl})$  is the intensity measured for each unique Bragg reflection with indexes (hkl),  $\langle I(\text{hkl}) \rangle$  is the average intensity for multiple measurements of this reflection. <sup>b</sup> Multiplicity independent *R*-factor,  $R_{\text{meas}} = \sum_{\text{hkl}} [N_{\text{hkl}} / (N_{\text{hkl}} - 1)]^{1/2} \sum_i |I_i(\text{hkl}) - \langle I(\text{hkl}) \rangle| / \sum_{\text{hkl}} \sum_i I(\text{hkl}) \times 100\%$ . <sup>c</sup> Precision independent *R*-factor,  $R_{\text{pim}} = \sum_{\text{hkl}} [1 / (N_{\text{hkl}} - 1)]^{1/2} \sum_i |I_i(\text{hkl}) - \langle I(\text{hkl}) \rangle| / \sum_i I_i(\text{hkl}) \times 100\%$ , where  $I_i(\text{hkl})$  is the observed intensity,  $\langle I(\text{hkl}) \rangle$  is the average intensity of multiple observations from symmetry-related reflections, and  $N_{\text{hkl}}$  is their multiplicity (Diederichs and Karplus, 1997).



**Supplementary Table 2: Structure refinement statistics**

| Data Set                                         | <i>E. coli</i> YtfE <sup>M</sup> | <i>E. coli</i> YtfE <sup>M</sup> -E159L | <i>E. coli</i> YtfE <sup>M</sup> -E125L |
|--------------------------------------------------|----------------------------------|-----------------------------------------|-----------------------------------------|
| Resolution limits (Å)                            | 59.05 – 2.19 (2.23-2.19)         | 46.40 – 2.36 (2.71 – 2.36)              | 53.20 – 1.87 (1.92 - 1.87)              |
| <i>R</i> -factor <sup>a</sup>                    | 0.212 (0.332)                    | 0.2516 (0.3787)                         | 0.183 (0.358)                           |
| nr. Reflections <sup>b</sup>                     | 43180 (1256) <sup>c</sup>        | 10610 (771)                             | 39805 (2633)                            |
| Free <i>R</i> -factor <sup>d</sup>               | 0.250 (0.349)                    | 0.2962 (0.3362)                         | 0.211 (0.392)                           |
| nr. Reflections <sup>b</sup>                     | 2235 (73)                        | 483 (30)                                | 2037 (113)                              |
| Coordinate error estimate (Å)<br><sup>e</sup>    | 0.28                             | 0.36                                    | 0.29                                    |
| <b>Model completeness and composition</b>        |                                  |                                         |                                         |
| Regions omitted                                  | 1A, 1B-8B                        | 1A-4A, 1B                               | 1A, 1B                                  |
| N° molecules in asymmetric unit                  | 2                                | 2                                       | 2                                       |
| Non-hydrogen protein atoms                       | 3512                             | 3446                                    | 3523                                    |
| Iron ions                                        | 4                                | 2                                       | 4                                       |
| Solvent molecules                                | 83                               | 12                                      | 323                                     |
| <b>Mean B values (Å<sup>2</sup>)<sup>f</sup></b> |                                  |                                         |                                         |
| Protein chain A                                  | 48.4                             | 72.6                                    | 35.1                                    |
| Protein chain B                                  | 67.6                             | 76.3                                    | 59.9                                    |
| Fe atoms                                         | 66.9                             | 49.4                                    | 56.0                                    |
| Solvent molecules                                | 50.6                             | 22.2                                    | 45.1                                    |
| <b>Model r.m.s. deviations from ideality</b>     |                                  |                                         |                                         |
| Bond lengths (Å)                                 | 0.002                            | 0.002                                   | 0.007                                   |
| Bond angles (°)                                  | 0.464                            | 0.445                                   | 0.806                                   |
| Chiral centers (Å <sup>3</sup> )                 | 0.033                            | 0.034                                   | 0.044                                   |
| Planar groups (Å)                                | 0.003                            | 0.003                                   | 0.006                                   |
| <b>Model validation <sup>g</sup></b>             |                                  |                                         |                                         |
| % Ramachandran outliers                          | 0.23                             | 1.16                                    | 0                                       |
| % Ramachandran favoured                          | 95.78                            | 92.11                                   | 98.16                                   |
| % Rotamer outliers                               | 0                                | 0.27                                    | 0.79                                    |
| C <sup>β</sup> outliers                          | 0                                | 0                                       | 0                                       |
| Clash score                                      | 2.19                             | 4.51                                    | 1.68                                    |
| <b>PDB accession ID</b>                          | <b>7BHA</b>                      | <b>7BHB</b>                             | <b>7BHC</b>                             |

Values in parentheses are for the highest resolution shell. <sup>a</sup>  $R$ -factor =  $\sum_{hkl} ||F_o| - |F_c|| / \sum_{hkl} |F_o|$ , where  $|F_o|$  and  $|F_c|$  are the observed and calculated structure factor amplitudes, respectively; <sup>b</sup> no  $\sigma(F_o)$  cutoff; <sup>c</sup> the Bijvoet mates were treated as separate observations in the refinement; <sup>d</sup> cross-validation  $R$ -factor computed from a randomly chosen subset of 5% of the total number of reflections that was not used in the refinement; <sup>e</sup> Maximum-likelihood estimate; <sup>f</sup> Calculated from isotropic or equivalent isotropic B-values; <sup>g</sup> Calculated with MOLPROBITY(Chen et al., 2010).

**Supplementary Table 3: B-values**

|                          | YtfE <sup>M</sup> | YtfE <sup>M</sup> -E159L | YtfE <sup>M</sup> -E125L |
|--------------------------|-------------------|--------------------------|--------------------------|
| <b>Chain A</b>           | 52.6              | 83.5                     | 40.3                     |
| <b>Chain B</b>           | 73.8              | 88.4                     | 67.6                     |
| <b>Domain A, chain A</b> | 70.6              | 126.0                    | 42.1                     |
| <b>Domain A, chain B</b> | 123.4             | 132.2                    | 95.4                     |
| <b>Domain B, chain A</b> | 44.5              | 65.5                     | 39.5                     |
| <b>Domain B, chain B</b> | 53.6              | 68.5                     | 55.3                     |

**Supplementary Table 4: Distances (Å) between irons (Fe1 and Fe2) and the ligand atoms from coordinating residues or other ligands.**

|            |                            | YtfE <sup>M</sup> | YtfE <sup>M</sup> -E125L |                            |                             | YtfE <sup>M</sup> -E159L |
|------------|----------------------------|-------------------|--------------------------|----------------------------|-----------------------------|--------------------------|
| <b>Fe1</b> | <b>H84 N<sup>ε2</sup></b>  | 2.19 Å            | 2.15 Å                   | <b>Fe1</b>                 | <b>H84 N<sup>ε2</sup></b>   | 2.72 Å                   |
|            | <b>H204 N<sup>ε2</sup></b> | 2.16 Å            | 2.17 Å                   |                            | <b>H204 N<sup>ε2</sup></b>  | 2.35 Å                   |
|            | <b>E133 O<sup>ε1</sup></b> | 2.11 Å            | 2.10 Å                   |                            | <b>E133 O<sup>ε21</sup></b> | 1.97 Å                   |
|            | <b>E208 O<sup>ε2</sup></b> | 2.06 Å            | 1.96 Å                   |                            | <b>E133 O<sup>ε2</sup></b>  | 2.63 Å                   |
|            | <b>O</b>                   | 2.02 Å            | 1.58 Å                   |                            | <b>E208 O<sup>ε1</sup></b>  | 2.53 Å                   |
| <b>Fe2</b> | <b>H129 N<sup>ε2</sup></b> | 2.13 Å            | 2.14 Å                   | <b>E208 O<sup>ε2</sup></b> | 1.91 Å                      |                          |
|            | <b>H160 N<sup>ε2</sup></b> | 2.16 Å            | 2.14 Å                   | <b>H<sub>2</sub>O</b>      | 3.17 Å                      |                          |
|            | <b>E133 O<sup>ε2</sup></b> | 2.00 Å            | 1.94 Å                   |                            |                             |                          |
|            | <b>E208 O<sup>ε1</sup></b> | 2.07 Å            | 2.16 Å                   |                            |                             |                          |
|            | <b>O</b>                   | 2.05 Å            | 2.04 Å                   |                            |                             |                          |

**Supplementary Table 5: Oligonucleotides used in this work**

| <b>Primer</b>                    | <b>Sequence</b>                      |
|----------------------------------|--------------------------------------|
| <i>Site-directed mutagenesis</i> |                                      |
| C3031A sense                     | 5'-TATGATATGGATTACGCCGCTGGCGGTAAGCAG |
| C3031A anti                      | 5'-CTGCTTACCGCCAGCGGCGTAATCCATATCATA |
| E125L sense                      | 5'-CATGCTGCATGAACTGCTTTCCAG          |
| E125L anti                       | 5'-GCTGGAAAGCAGTTCATGCAGCATG         |
| E125N sense                      | 5'-CATGCTGCATGAAAATCTTTCCAGCC        |
| E125N anti                       | 5'-GTGGCTGGAAAGATTTTCATGCAGC         |
| E125D sense                      | 5'-CATGCTGCATGAAGATCTTTCCAG          |
| E125D anti                       | 5'-GCTGGAAAGATCTTCATGCAGCATG         |
| E159N sense                      | 5'-GTAATGGAAAGCAATCACGATGAAGC        |
| E159N anti                       | 5'-GCTTCATCGTGATTGCTTTCCATTAC        |
| <i>Gene cloning</i>              |                                      |
| IscU(T18)Fw                      | 5'-GAATCAGGGGATCCTATAATGGC           |
| IscU(T18)Rv                      | 5'-GAAGCAAAGGTACCGTTGAGGTTT          |
| IscS(T18)Fw                      | 5'-GAGTGATGGATCCAGTTTATAGAG          |
| IscS(T18)Rv                      | 5'-GGCTCATCAGGTACCCGGTATCG           |
| YtfE(flag)Fw                     | 5'-TGAGGTATCACATATGGCTTATCGC         |
| YtfE(flag)Rv                     | 5'-CAGCTTTTGGTACCCTCACCCGCC          |
| IscS(pacyc)Fw                    | 5'-GTACGGAGTGGATCCAGCAATGAAAT        |
| IscS(pacyc)Rv                    | 5'-GCCATTATAAGCTTTCTGATTCCG          |
| IscU(pacyc)Fw                    | 5'-GAATCAGGGGATCCTATAATGGCTT         |
| IscU(pacyc)Rv                    | 5'-GTAATCGACATAACCAAGCTTCAACTC       |
| IscU(pacyc-S)Fw                  | 5'-CAGGAGAATTTTCATATGGCTTACAG        |
| IscU(pacyc-S)Rv                  | 5'-CCTCAACTCGAGTTTGTCTCACG           |
| IscS(pet11)Fw                    | 5'-GTACGGAGTCTCGAGAGCAATGAAAAT       |
| IscS(pet11)Rv                    | 5'-GTAAGCCATTATGGATCCTCCTGATTC       |
| IscS(pbad)Fw                     | 5'-AGTTTATAGAGCCATGGAATTACCGAT       |
| IscS(pbad)Rv                     | 5'-ATTCCGATACCGACGTCTGATGAGC         |
| IscU(pet11)Fw                    | 5'-CGGACTCGAGAGAATTTATAATGGCT        |
| IscU(pet11)Rv                    | 5'-GTAATCGACGGATCCAAACCTCAAC         |
| IscU(pbad)Fw                     | 5'-GAATTTACCATGGCTTACAGCGAAAAAGTTATC |
| IscU(pbad)Rv                     | 5'-CAAACCTCAACGACGTCTTTGCTTCAC       |

**Supplementary Table 6: Plasmids and strains used in this work**

| <b>Plasmids</b>                   | <b>Description</b>                                                                                                             | <b>Reference/<br/>Source</b> |
|-----------------------------------|--------------------------------------------------------------------------------------------------------------------------------|------------------------------|
| pET-YtfE                          | Vector for expression                                                                                                          | (Justino et al., 2006)       |
| pET- YtfE <sup>M</sup> (C30AC31A) | Vector for expression                                                                                                          | This work                    |
| pET- YtfE <sup>M</sup> -E125L     | Vector for expression                                                                                                          | This work                    |
| pET- YtfE <sup>M</sup> -E159L     | Vector for expression                                                                                                          | This work                    |
| pET-YtfE-E125L                    | Vector for expression                                                                                                          | This work                    |
| pET-YtfE-E125N                    | Vector for expression                                                                                                          | This work                    |
| pET-YtfE-E125D                    | Vector for expression                                                                                                          | This work                    |
| pET-YtfE-E159L                    | Vector for expression                                                                                                          | (Nobre et al., 2015)         |
| pET-YtfE-E159N                    | Vector for expression                                                                                                          | This work                    |
| pET-YtfE <sup>Truncated</sup>     | Vector for expression                                                                                                          | (Nobre et al., 2015)         |
| pQE60-IscU-(His)6                 | Vector for expression                                                                                                          | Laboratory stock             |
| pQE30-(His)6-IscS                 | Vector for expression                                                                                                          | Laboratory stock             |
| pKT25 / pKTN25                    | Vector that allows construction of fusions at the N-terminal/C-terminal of T25 fragment (amino acids 1–224 of CyaA)            | Euromedex                    |
| pUT18 / pUT18C                    | Vector that allows construction of in-frame fusions at the N-terminal/C-terminal of T18 fragment (amino acids 225–399 of CyaA) | Euromedex                    |
| pKT25-YtfE                        | YtfE fused to T25 fragment in C-terminal                                                                                       | (Silva et al., 2018)         |
| pKTN25-YtfE                       | YtfE fused to T25 fragment in N-terminal                                                                                       | (Silva et al., 2018)         |
| pUT18-IscU                        | IscU fused to T18 fragment in N-terminal                                                                                       | This work                    |
| pUT18-IscS                        | IscS fused to T18 fragment in N-terminal                                                                                       | This work                    |
| pUT18C-IscS                       | IscS fused to T18 fragment in C-terminal                                                                                       | This work                    |
| pFLAG-YtfE                        | Vector for expression                                                                                                          | This work                    |
| pACYC-(His)6-IscS                 | Vector for expression                                                                                                          | This work                    |
| pACYC-(His)6-IscU                 | Vector for expression                                                                                                          | This work                    |
| pACYC-IscU-(S-tag)                | Vector for expression                                                                                                          | This work                    |
| pACYC-(His)6-IscS-IscU-(S-tag)    | Vector for double expression                                                                                                   | This work                    |
| pET11a-link-N-GFP                 | Vector for expression of fusions with N-terminal fragment of GFP                                                               | Addgene                      |
| pMRBAD-link-C-GFP                 | Vector for expression of fusions with C-terminal fragment of GFP                                                               | Addgene                      |

|                   |                                       |                      |
|-------------------|---------------------------------------|----------------------|
| pET11a-YtfE-N-GFP | YtfE fused to N-terminal GFP fragment | (Silva et al., 2018) |
| pMRBAD-YtfE-C-GFP | YtfE fused to C-terminal GFP fragment | (Silva et al., 2018) |
| pET11a-IscU-N-GFP | IscU fused to N-terminal GFP fragment | This work            |
| pMRBAD-IscU-C-GFP | IscU fused to C-terminal GFP fragment | This work            |
| pET11a-IscS-N-GFP | IscS fused to N-terminal GFP fragment | This work            |
| pMRBAD-IscS-C-GFP | IscS fused to C-terminal GFP fragment | This work            |

| <b><i>E. coli</i> Strain</b> | <b>Description</b>                                                                            | <b>Source</b> |
|------------------------------|-----------------------------------------------------------------------------------------------|---------------|
| XL1-Blue                     | recA1 endA1 gyrA96 thi-1 hsdR17 supE44 relA1 lac [F' proAB lacIqZΔM15 Tn10 (Tetr)]            | Agilent       |
| BL21 DE3 Gold                | B F- ompT hsdS(rB- mB-) dcm+ Tetr gal λ(DE3) endA The                                         | Agilent       |
| DHM1                         | F-, cya-854, recA1, endA1, gyrA96 (Nal <sup>r</sup> ), thi1, hsdR17, spoT1, rfbD1, glnV44(AS) | Euromedex     |
| M15                          | M15/F'M15 (DZ291)                                                                             | Quiagen       |

## References

- Chen, V. B., Arendall, W. B., Headd, J. J., Keedy, D. A., Immormino, R. M., Kapral, G. J., et al. (2010). MolProbity: All-atom structure validation for macromolecular crystallography. *Acta Crystallogr. Sect. D Biol. Crystallogr.* 66, 12–21. doi:10.1107/S0907444909042073.
- Diederichs, K., and Karplus, P. A. (1997). Improved R-factors for diffraction data analysis in macromolecular crystallography. *Nat. Struct. Biol.* 4, 269–275. doi:10.1038/nsb0497-269.
- Justino, M. C., Almeida, C. C., Gonçalves, V. L., Teixeira, M., and Saraiva, L. M. (2006). *Escherichia coli* YtfE is a di-iron protein with an important function in assembly of iron-sulphur clusters. *FEMS Microbiol. Lett.* 257, 278–84. doi:10.1111/j.1574-6968.2006.00179.x.
- Nobre, L. S., Lousa, D., Pacheco, I., Soares, C. M., Teixeira, M., and Saraiva, L. M. (2015). Insights into the structure of the diiron site of RIC from *Escherichia coli*. *FEBS Lett.* 589, 426–431. doi:10.1016/j.febslet.2014.12.028.
- Silva, L. S. O., Baptista, J. M., Batley, C., Andrews, S. C., and Saraiva, L. M. (2018). The di-iron RIC protein (YtfE) of *Escherichia coli* interacts with the DNA-binding protein from starved cells (Dps) to diminish RIC protein-mediated redox stress. *J. Bacteriol.* 200. doi:10.1128/JB.00527-18.
